# Supplementary material for: Flame synthesis of 26-faceted maghemite polyhedrons grown via 14-faceted polyhedrons and their carbon composites for Li-ion battery application
Source: Royal Society of Chemistry journal article supplement (doi:10.1039/c2ce26146d), 2012-01-01
Supplement: c2ce26146d.pdf [file c2ce26146d.pdf]

## Flame synthesis of 26-faceted maghemite polyhedrons grown via 14-faceted polyhedrons and their carbon composites for Li-ion Battery application

Shaukatali Inamdar, Hyuck-Soo Choi, Min-Sik Kim, Kiran Chaudhari and Jong-Sung Yu\*

### Supporting Information:

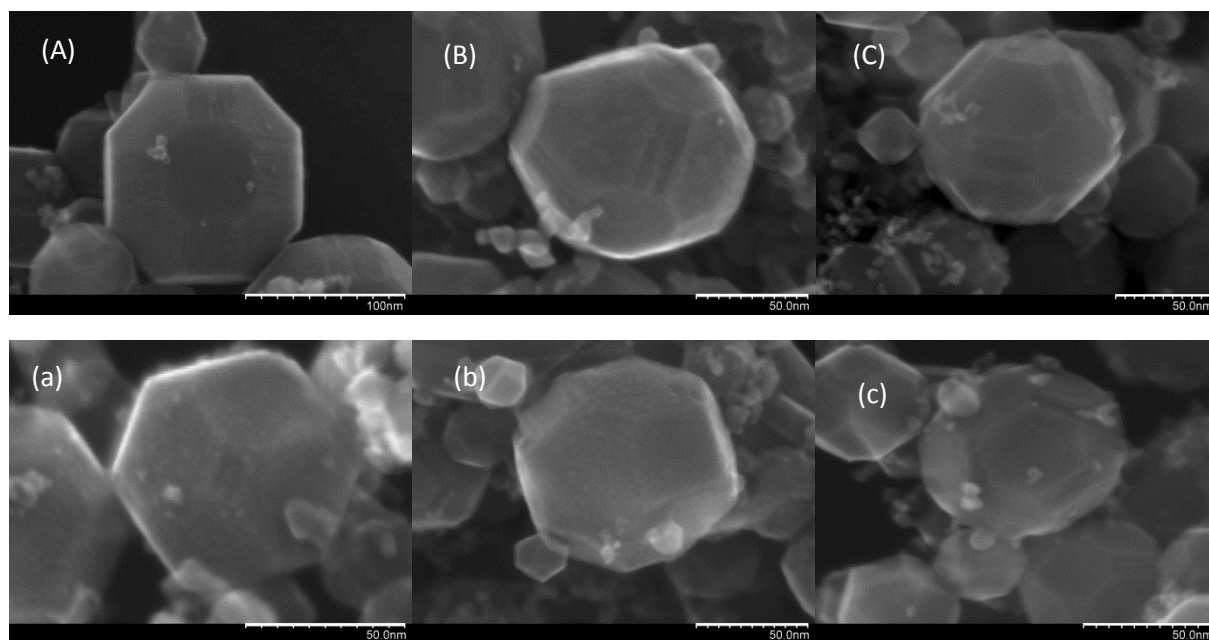

**Figure S1.** Virgin HR-SEM images without drawing facets of 26-faceted truncated cubooctahedrons prepared by burning ferrocene using (A) methanol, (B) Ethanol and (C) DMF. The 14-faceted truncated octahedron prepared using (a) methanol, (b) Ethanol and (c) DMF respectively. (The scale bar is 100 nm for (a) and 50 nm for rest images)

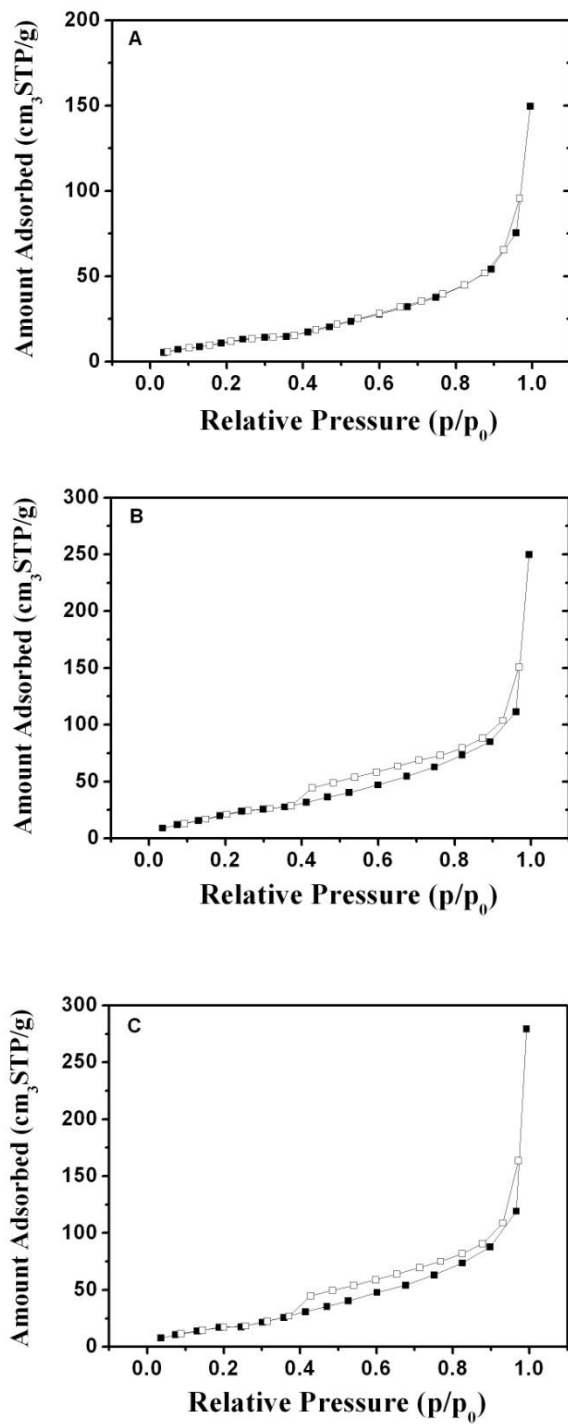

**Figure S2.** Nitrogen adsorption-desorption isotherms at 77K for the maghemite polyhedrons obtained using (A) methanol, (B) Ethanol and (C) DMF.

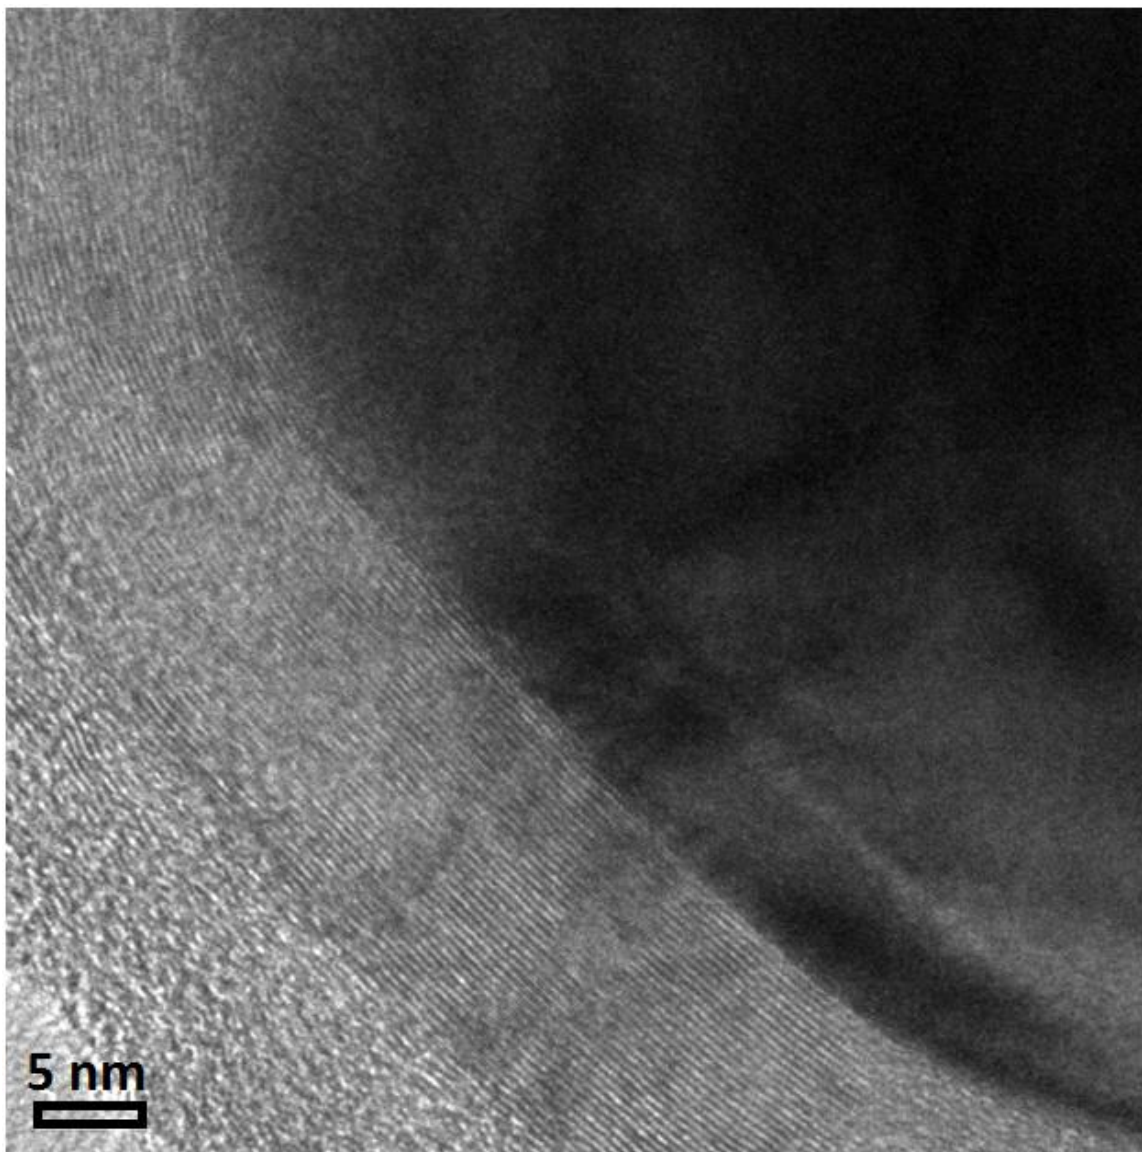

**Figure S3.** Enlarged HR-TEM image of flame synthesized  $\gamma\text{-Fe}_2\text{O}_3\text{@C}$  prepared using acetone as solvent, showing the encapsulation of maghemite polyhedrons by many layers of carbon shells.
